# Supplementary material for: Ecotopic Expression of the Antimicrobial Peptide DmAMP1W Improves Resistance of Transgenic Wheat to Two Diseases: Sharp Eyespot and Common Root Rot
Source: MDPI journal article supplement (doi:10.3390/ijms21020647), 2020-01-18
Supplement: s1 [file s1]

**Ecotopic Expression of the Antimicrobial Peptide DmAMP1W Improves  
Resistance of Transgenic Wheat to two Diseases: Sharp Eyespot and Common  
Root Rot**

Qiang Su, Ke Wang, Zengyan Zhang\*

The National Key Facility for Crop Gene Resources and Genetic Improvement, Institute of Crop  
Sciences, Chinese Academy of Agricultural Sciences, Beijing 100081, China

Qiang Su: [suqiangcaas@163.com](mailto:suqiangcaas@163.com)

Ke Wang: [wangke03@caas.cn](mailto:wangke03@caas.cn)

Zengyan Zhang: [zhangzengyan@caas.cn](mailto:zhangzengyan@caas.cn)

**\* Correspondence:** Zengyan Zhang

**Postal address:** Institute of Crop Sciences, Chinese Academy of Agricultural Sciences,  
Zhongguancun South Street12, Beijing 100081, China

**Supplementary data**

**Supplemental Figure S1** The coding sequence and amino acid sequence of DmAMP1W. Blue part represents the signal peptide (locating no. 1-28 AA residues). Green part represents the Knot1 domain (at 30 to 78 AA). Yellow part indicates (6×) His tag.

|            |     |                                                              |     |     |     |     |     |   |   |   |   |   |   |   |   |   |   |   |   |   |   |
|------------|-----|--------------------------------------------------------------|-----|-----|-----|-----|-----|---|---|---|---|---|---|---|---|---|---|---|---|---|---|
| mRNA       | 1   | 10                                                           | 20  | 30  | 40  | 50  | 60  |   |   |   |   |   |   |   |   |   |   |   |   |   |   |
|            |     | ATGGTGAACAGGTCCGTGGCCTTCTCCGCCTTCGTGCTCATCCTCTTCGTGCTCGCCATC |     |     |     |     |     |   |   |   |   |   |   |   |   |   |   |   |   |   |   |
| Amino Acid | 1   | M                                                            | V   | N   | R   | S   | V   | A | F | S | A | F | V | L | I | L | F | V | L | A | I |
|            |     | 70                                                           | 80  | 90  | 100 | 110 | 120 |   |   |   |   |   |   |   |   |   |   |   |   |   |   |
|            | 61  | TCCGACATCGCCTCCGTGTCCGGCGAGCTCTGCGAGAAGGCCTCCAAGACCTGGTCCGGC |     |     |     |     |     |   |   |   |   |   |   |   |   |   |   |   |   |   |   |
|            | 21  | S                                                            | D   | I   | A   | S   | V   | S | G | E | L | C | E | K | A | S | K | T | W | S | G |
|            |     | 130                                                          | 140 | 150 | 160 | 170 | 180 |   |   |   |   |   |   |   |   |   |   |   |   |   |   |
|            | 121 | AACTGCGGCAACACCGGCCACTGCGACAACCAATGCAAGTCCTGGGAGGGCGCCGCCAC  |     |     |     |     |     |   |   |   |   |   |   |   |   |   |   |   |   |   |   |
|            | 41  | N                                                            | C   | G   | N   | T   | G   | H | C | D | N | Q | C | K | S | W | E | G | A | A | H |
|            |     | 190                                                          | 200 | 210 | 220 | 230 | 240 |   |   |   |   |   |   |   |   |   |   |   |   |   |   |
|            | 181 | GGCGCCTGCCACGTGAGGAACGGCAAGCACATGTGCTTCTGCTACTTCAACTGCCATCAT |     |     |     |     |     |   |   |   |   |   |   |   |   |   |   |   |   |   |   |
|            | 61  | G                                                            | A   | C   | H   | V   | R   | N | G | K | H | M | C | F | C | Y | F | N | C | H | H |
|            |     | 250                                                          |     |     |     |     |     |   |   |   |   |   |   |   |   |   |   |   |   |   |   |
|            | 241 | CACCATCACCATTGA                                              |     |     |     |     |     |   |   |   |   |   |   |   |   |   |   |   |   |   |   |
|            | 81  | H                                                            | H   | H   | H   | *   |     |   |   |   |   |   |   |   |   |   |   |   |   |   |   |

**Supplemental Figure S2** Alignment of amino acid sequences of DmAMP1W and DmAMP1mature peptide (Accession: P0C8Y4). The software DANMAN was used to perform the sequence alignment.

|               |                                              |    |
|---------------|----------------------------------------------|----|
| DmAMP1_mature | .....ELCEKASKTWSGNCNT                        | 17 |
| DmAMP1W       | MVNRSVAFSAFVLILFVLAISDIASVSGELCEKASKTWSGNCNT | 45 |
| Consensus     | elcekasktwsgncnt                             |    |
| DmAMP1_mature | GHCDNQCKSWEGAAGACHVRNGKHMCFYFNC.....         | 50 |
| DmAMP1W       | GHCDNQCKSWEGAAGACHVRNGKHMCFYFNC              | 83 |
| Consensus     | ghcdnqckswegaahgachvrngkhmcfcyfnc            |    |
